# Supplementary material for: Tough, rapid-recovery composite hydrogels fabricated via synergistic core–shell microgel covalent bonding and Fe3+coordination cross-linking
Source: Royal Society of Chemistry journal article supplement (doi:10.1039/c7sm00125h), 2017-01-01
Supplement: c7sm00125h1.pdf [file c7sm00125h1.pdf]

## *Supporting information*

### **Tough, Rapid-Recovery Composite Hydrogel Fabricated Using Synergic Core–Shell Microgel Covalent Bonding and Fe<sup>3+</sup>**

#### **Coordination Cross-Linking**

Xuechen Liang,<sup>ab</sup> Yukun Deng,<sup>ab</sup> Xiaopeng Pei,<sup>ac</sup> Kankan Zhai,<sup>ac</sup> Kun Xu,<sup>a\*</sup> Ying Tan,<sup>a\*</sup> Xinyuan Gong,<sup>a</sup>  
and Pixin Wang<sup>a</sup>

<sup>a</sup> Key Laboratory of Polymer Ecomaterials, Changchun Institute of Applied Chemistry, Chinese Academy of Sciences, Changchun 130022,  
Jilin, P. R. China.

<sup>b</sup> University of Chinese Academy of Sciences, Beijing 100049, P. R. China.

<sup>c</sup> University of Science and Technology of China, Hefei 230026, P. R. China.

E-mail: xukun@ciac.ac.cn; tanying@ciac.ac.cn.

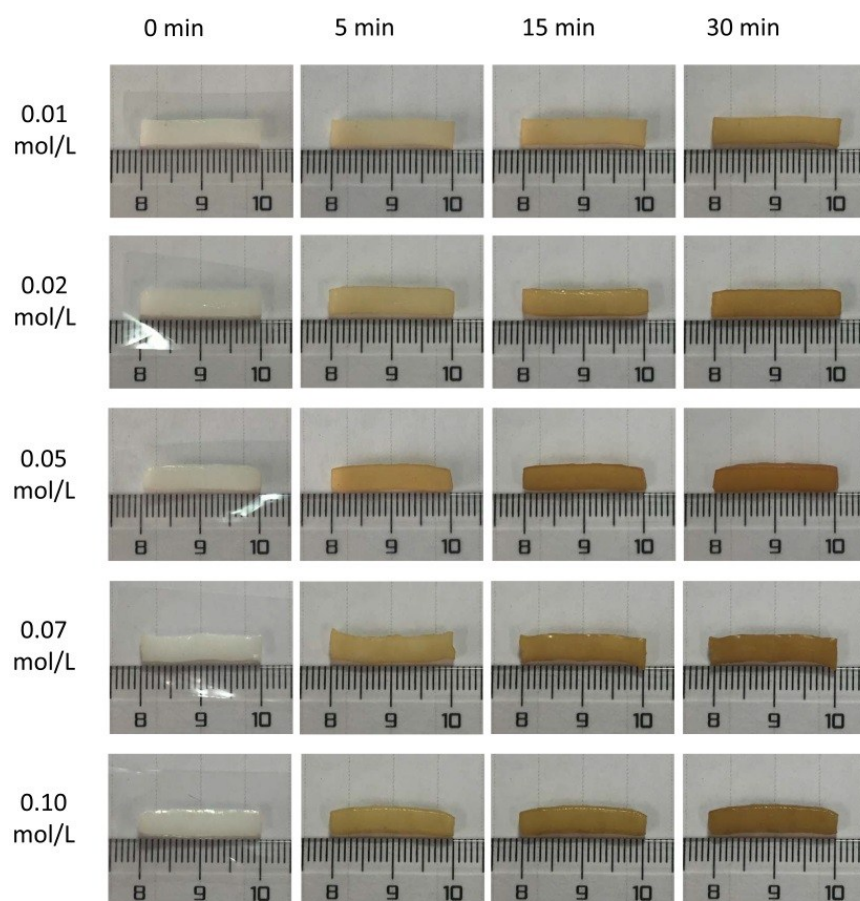

**Fig. S1** The photographs of hydrogels immersed in various concentrations of  $\text{FeCl}_3$  within 30 min. The size of each photograph is  $2.5 \text{ cm} \times 3.0 \text{ cm}$ .

**Table S1** The polymer volume fractions of hydrogels immersed into 0.05 mol/L FeCl<sub>3</sub> solution.

| <i>Soaking<br/>time</i><br>$C_{(\text{Fe}^{3+})}$ | 0 min | 5 min | 15 min | 30 min | 1 h   | 2 h   | 3 h   | 6 h   | 18 h  |
|---------------------------------------------------|-------|-------|--------|--------|-------|-------|-------|-------|-------|
|                                                   | v/v%  | v/v%  | v/v%   | v/v%   | v/v%  | v/v%  | v/v%  | v/v%  | v/v%  |
| 0.05 mol/L                                        | 25.32 | 25.08 | 24.67  | 23.83  | 21.08 | 20.33 | 19.57 | 19.51 | 19.45 |

The polymer volume fractions were calculated by  $V_{\text{dry}}/V$ , where  $V_{\text{dry}}$  was the volume of dry hydrogel, and  $V$  was the volume of hydrogel before dying. The volumes were measured by displacement method, and the solvent was n-hexane.

**Table S2** The polymer volume fractions of hydrogels immersed into various concentrations of FeCl<sub>3</sub> solution within 30 min.

| $C_{(\text{Fe}^{3+})}$ | polymer volume fraction, v/v% |
|------------------------|-------------------------------|
| 0.01 mol/L             | 24.07                         |
| 0.02 mol/L             | 23.67                         |
| 0.05 mol/L             | 23.83                         |
| 0.07 mol/L             | 23.90                         |
| 0.10 mol/L             | 23.81                         |

**Table S3** The polymer volume fractions of hydrogels with various AAm/AAC molar ratios and monomer contents. (0.05 mol/L FeCl<sub>3</sub>, 30 min)

| Name           | polymer volume fraction, v/v% | Name                             | polymer volume fraction, v/v% |
|----------------|-------------------------------|----------------------------------|-------------------------------|
| H-15-(93/7)    | 25.32                         | Fe <sup>3+</sup> -H-15-(93/7)    | 23.83                         |
| H-15-(86/14)   | 26.08                         | Fe <sup>3+</sup> -H-15-(86/14)   | 24.15                         |
| H-15-(79/21)   | 25.75                         | Fe <sup>3+</sup> -H-15-(79/21)   | 23.48                         |
| H-10-(93/7)    | 24.02                         | Fe <sup>3+</sup> -H-10-(93/7)    | 21.71                         |
| H-20-(93/7)    | 27.37                         | Fe <sup>3+</sup> -H-20-(93/7)    | 25.67                         |
| MBA (0.1 mol%) | 25.03                         | Fe <sup>3+</sup> -MBA (0.1 mol%) | 22.05                         |

**Table S4** The polymer volume fractions of hydrogels immersed into EDTA-2Na/urea solution.

| Solvent                                 | polymer volume fraction, v/v% |
|-----------------------------------------|-------------------------------|
| H <sub>2</sub> O                        | 16.05                         |
| 0.01 M EDTA-2Na                         | 16.64                         |
| 0.02 M EDTA-2Na                         | 16.29                         |
| 0.05 M EDTA-2Na                         | 15.84                         |
| 0.5 M CO(NH <sub>2</sub> ) <sub>2</sub> | 16.88                         |

The swelling ratios of hydrogel samples were fixed at 1.5 times.

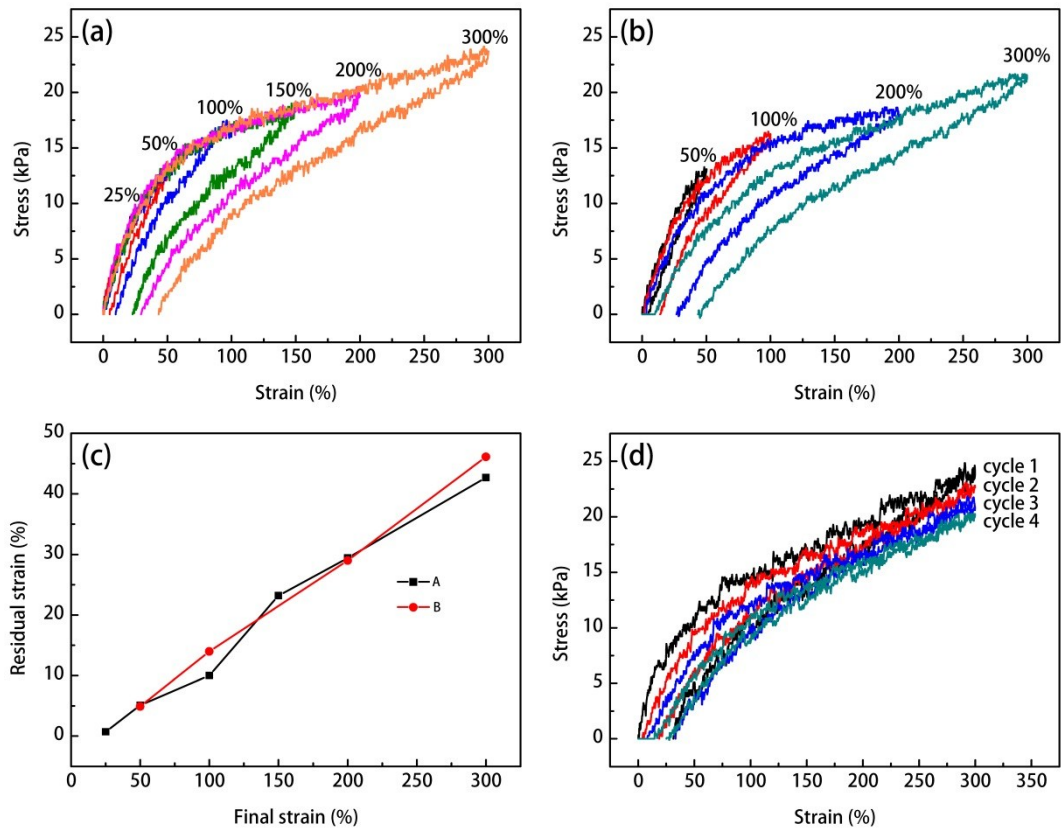

**Fig. S2** Cyclic loading–unloading of H-15-(93/7) hydrogel under various conditions: (a) tensile loading–unloading under different strains (25%, 50%, 100%, 150%, 200%, 300%), (b) continuous cyclic tensile tests under incremental strain (50%, 100%, 200%, 300%), (c) the residual strain vs. final strain of Fig. S2a (A) and of Fig. S2b (B), (d) four successive cyclic tensile tests under a strain of 300%.
